# Supplementary material for: Development of (quinolinyl)amido-based pincer palladium complexes: a robust and phosphine-free catalyst system for C–H arylation of benzothiazoles
Source: Royal Society of Chemistry journal article supplement (doi:10.1039/c7nj00452d), 2017-01-01

## Supporting information

# Development of (quinolinyl)amido-based pincer palladium complexes: A robust and phosphine-free catalyst system for C–H arylation of benzothiazoles

Hanumanprasad Pandiri,<sup>a</sup> Vineeta Soni,<sup>a</sup> Rajesh G. Gonnade,<sup>b</sup> and Benudhar Punji<sup>\*,a</sup>

<sup>a</sup> *Organometallic Synthesis and Catalysis Group, Chemical Engineering Division, CSIR–National Chemical Laboratory (CSIR–NCL), Dr. Homi Bhabha Road, Pune – 411 008, Maharashtra, INDIA. Phone: + 91-20-2590 2733, Fax: + 91-20-2590 2621*

*E-mail: [b.punji@ncl.res.in](mailto:b.punji@ncl.res.in)*

<sup>b</sup> *Centre for Material Characterization, CSIR–National Chemical Laboratory (CSIR–NCL), Dr. Homi Bhabha Road, Pune – 411 008, Maharashtra, INDIA*

## Contents

|                                       | Page # |
|---------------------------------------|--------|
| 1. Kinetics data                      | S3     |
| 2. X-ray structure determination      | S5     |
| 3. References                         | S8     |
| 4. MALDI-TOF-MS of intermediates      | S9     |
| 5. NMR spectra of ligand precursors   | S10    |
| 6. NMR spectra of palladium complexes | S12    |

## 1. Kinetics data

**Table S1.** Concentration of benzothiazole and product **7aa** at different time intervals.

| Time (min) | Conc. of benzothiazole [M] | Conc. of <b>7aa</b> [M] |
|------------|----------------------------|-------------------------|
| 10         | 0.2691                     | 0.0285                  |
| 20         | 0.2403                     | 0.0588                  |
| 30         | 0.2196                     | 0.0798                  |
| 40         | 0.2068                     | 0.0900                  |
| 50         | 0.1803                     | 0.1089                  |
| 60         | 0.1559                     | 0.1239                  |
| 90         | 0.1232                     | 0.1551                  |
| 120        | 0.1076                     | 0.1812                  |
| 180        | 0.0634                     | 0.2259                  |

Conditions: Benzothiazole (0.3 M), 4-iodotoluene (0.45 M), K<sub>2</sub>CO<sub>3</sub> (1.5 equiv), **3a** (0.0015 M), CuI (0.003 M), mesitylene (0.03 mL, 0.1078 M, internal standard), DMSO (required amount to make total volume 2.0 mL).

**Table S2.** Concentration of various arylation products at different time intervals.

| Time (min) | Conc. of various arylated products of benzothiazole [M] |        |        |        |             |
|------------|---------------------------------------------------------|--------|--------|--------|-------------|
|            | R = OMe                                                 | R = Me | R = H  | R = Cl | R = C(O)OMe |
| 10         | 0.0762                                                  | 0.0285 | 0.0351 | 0.0165 | 0.0102      |
| 20         | 0.1092                                                  | 0.0588 | 0.0504 | 0.0336 | 0.0238      |
| 30         | 0.1446                                                  | 0.0798 | 0.0675 | 0.0513 | 0.0278      |
| 40         | 0.1665                                                  | 0.0900 | 0.0840 | 0.0549 | 0.0328      |
| 50         | 0.1896                                                  | 0.1089 | 0.0969 | 0.0648 | 0.0352      |
| 60         | 0.2100                                                  | 0.1239 | 0.1110 | 0.0675 | 0.0426      |

Conditions: Benzothiazole (0.3 M), 4-iodoarene (0.45 M), K<sub>2</sub>CO<sub>3</sub> (1.5 equiv), **3a** (0.0015 M), CuI (0.003 M), mesitylene (0.03 mL, 0.1078 M, internal standard), DMSO (required amount to make total volume 2.0 mL).

**Table S3.** Values of  $k_R$ ,  $k_R/k_H$ ,  $\log(k_R/k_H)$  and Hammett substituent constant ( $\sigma_p$ ).

|                            | R = OMe | R = Me | R = H | R = Cl | R = C(O)OMe |
|----------------------------|---------|--------|-------|--------|-------------|
| $k_R$ ( $\times 10^{-3}$ ) | 2.66    | 1.82   | 1.53  | 1.01   | 0.58        |
| $k_R/k_H$                  | 1.74    | 1.19   | 1.00  | 0.66   | 0.38        |
| $\log(k_R/k_H)$            | 0.24    | 0.08   | 0.00  | -0.18  | -0.42       |
| $\sigma_p$                 | -0.27   | -0.17  | 0.00  | 0.23   | 0.45        |

$k_R$  = slope of corresponding plots of conc. of product vs time.  $\sigma_p$  values are *para* substituent constants determined by Hammett.

## 2. X-ray structure determination

The good quality single crystals of compounds **2a**, **3a** and **4a** were selected using Leica polarizing microscope. The selected crystals of compounds **2a** and **3a** were mounted on a Bruker APEX-II CCD diffractometer having graphite-monochromatized ( $\text{MoK}_\alpha = 0.71073\text{\AA}$ ) radiation for single crystal X-ray diffraction experiment. The crystals were kept at  $T = 150(2)$  K (**3a**) and  $T = 200(2)$  K (**2a**) during data collection. The X-ray generator was operated at 50 kV and 30 mA. A preliminary set of cell constants and an orientation matrix were calculated from three sets of 12 frames (total 36 frames). Data were collected with  $\omega$  scan width of  $0.5^\circ$  at eight different settings of  $\varphi$  and  $2\theta$ , keeping the sample-to-detector distance fixed at 5.00 cm for both the compounds. The X-ray data collection was monitored by APEX2 program (Bruker, 2006).<sup>S1</sup> All the data were corrected for Lorentzian, polarization and absorption effects using SAINT<sup>S2</sup> and SADABS programs (Bruker, 2006). Using ShelXTL<sup>S3</sup> (Bruker) program suite, the structure was solved with the ShelXS-97<sup>S4</sup> (Sheldrick, 2008) structure solution program, using direct methods. The model was refined with version of ShelXL-2013<sup>S5</sup> (Sheldrick, 2013) using Least Squares minimisation. All the hydrogen atoms were placed in geometrically idealized position and constrained to ride on their parent atoms, except water hydrogen atoms in **2a**, which were located in difference Fourier and refined isotropically.

The X-ray intensity measurements on crystals of **4a** carried out on a Bruker D8 VENTURE Kappa Duo PHOTON II CPAD diffractometer with ( $\text{MoK}_\alpha = 0.71073\text{\AA}$ ) radiation. The crystal was kept at  $T = 100(2)$  K during data collection. The X-ray generator was operated at 50 kV and 1.4 mA. A preliminary set of cell constants and an orientation matrix were calculated from three sets of 12 frames (total 36 frames). Data were collected

with  $\omega$  scan width of  $0.5^\circ$  at eight different settings of  $\varphi$  and  $2\theta$ , keeping the sample-to-detector distance fixed at 4.00 cm. The X-ray data collection was monitored by APEX3 program (Bruker, 2016).<sup>S6</sup> All the data were corrected for Lorentzian, polarization and absorption effects using SAINT<sup>S2</sup> and SADABS programs integrated in APEX3 program suite (Bruker, 2016). Using APEX3 (Bruker) program suite, the structure was solved with the ShelXS-97<sup>S4</sup> (Sheldrick, 2008) structure solution program, using direct method. The model was refined with version of ShelXL-2014<sup>S7</sup> (Sheldrick, 2014) using Least Squares minimisation. All the hydrogen atoms were placed in geometrically idealized position and constrained to ride on their parent atoms, except water hydrogen atoms, which were located in difference Fourier and refined isotropically.

The *ORTEP* III<sup>S8</sup> view of all three compounds were drawn with 50% probability displacement ellipsoids and H atoms are not included for the clarity. Crystal data for the structures have been deposited in the Cambridge Crystallographic Data Center with numbers (compound numbers) CCDC-1487195 (**2a**), CCDC-1487196 (**3a**) and CCDC-1502139 (**4a**).

**Table S4.** Crystal data and structure refinement for complexes **2a**, **3a** and **4a**.

|                                               | <b>2a</b>                                                        | <b>3a</b>                                            | <b>4a</b>                                           |
|-----------------------------------------------|------------------------------------------------------------------|------------------------------------------------------|-----------------------------------------------------|
| Empirical formula                             | C <sub>17</sub> H <sub>23</sub> N <sub>3</sub> O <sub>4</sub> Pd | C <sub>15</sub> H <sub>18</sub> ClN <sub>3</sub> OPd | C <sub>15</sub> H <sub>18</sub> IN <sub>3</sub> OPd |
| Formula weight                                | 439.78                                                           | 398.17                                               | 489.62                                              |
| Temperature, K                                | 200(2)                                                           | 150(2)                                               | 100(2)                                              |
| Cryst. Syst.                                  | Monoclinic                                                       | Monoclinic                                           | Monoclinic                                          |
| Space group                                   | P2(1)/c                                                          | C2/c                                                 | P2(1)/c                                             |
| <i>a</i> (Å)                                  | 10.8321(4)                                                       | 14.7945(6)                                           | 10.5522(12)                                         |
| <i>b</i> (Å)                                  | 23.7645(8)                                                       | 13.1480(5)                                           | 11.3163(18)                                         |
| <i>c</i> (Å)                                  | 6.9558(2)                                                        | 16.0956(7)                                           | 13.8002(13)                                         |
| $\alpha$ (°)                                  | 90                                                               | 90                                                   | 90                                                  |
| $\beta$ (°)                                   | 103.107(2)                                                       | 102.202(2)                                           | 104.277(4)                                          |
| $\gamma$ (°)                                  | 90                                                               | 90                                                   | 90                                                  |
| <i>V</i> (Å <sup>3</sup> )                    | 1743.91(10)                                                      | 3060.2(2)                                            | 1597.0(3)                                           |
| <i>Z</i>                                      | 4                                                                | 8                                                    | 4                                                   |
| $\rho$ calcd. Mg/m <sup>3</sup>               | 1.675                                                            | 1.728                                                | 2.036                                               |
| $\varepsilon$ (mm <sup>-1</sup> )             | 1.091                                                            | 1.389                                                | 3.097                                               |
| <i>F</i> (000)                                | 896                                                              | 1600                                                 | 944                                                 |
| Crystal size (mm)                             | 0.46 x 0.31 x 0.21                                               | 0.46 x 0.40 x 0.32                                   | 0.22 x 0.19 x 0.11                                  |
| $\theta$ (min, max) (°)                       | 1.714, 24.996                                                    | 2.093, 24.995                                        | 2.685, 33.498                                       |
| R(int)                                        | 0.0411                                                           | 0.0179                                               | 0.0511                                              |
| Independent reflections                       | 3049                                                             | 2696                                                 | 6134                                                |
| Completeness to $\theta$ (%)                  | 96.5                                                             | 97.5                                                 | 99.8                                                |
| Max. and min. transmission                    | 0.8033, 0.6342                                                   | 0.6649, 0.5675                                       | 0.727, 0.549                                        |
| Data / restraints / parameters                | 3049 / 0 / 237                                                   | 2696 / 0 / 192                                       | 6134 / 0 / 193                                      |
| GOF on F <sup>2</sup>                         | 1.300                                                            | 1.101                                                | 1.190                                               |
| R1, wR2 ( <i>I</i> > 2 $\sigma$ ( <i>I</i> )) | 0.0621, 0.1062                                                   | 0.0181, 0.0420                                       | 0.0195, 0.0379                                      |
| R1, wR2 (all data)                            | 0.0742, 0.1099                                                   | 0.0187, 0.0423                                       | 0.0253, 0.0392                                      |

### 3. References

- S1. APEX2 suite for crystallographic software, Bruker axs, Madison, WI (Bruker, 2006).
- S2. SAINT - Software for the Integration of CCD Detector System Bruker Analytical X-ray Systems, Bruker axs, Madison, WI (Bruker, 2006 and Bruker, 2016).
- S3. ShelXTL, Bruker axs, Madison, WI (Bruker, 2006).
- S4. G. M. Sheldrick, A short history of ShelX, *Acta Cryst.*, 2008, **A64**, 339-341.
- S5. T. Gruene, H. W. Hahn, A. V. Luebben, F. Meilleur and G. M. Sheldrick, *J. Appl. Cryst.* 2014, **47**, 462-466.
- S6. APEX3 suite for crystallographic software, Bruker axs, Madison, WI (Bruker, 2016).
- S7. G. M. Sheldrick, SHELXL 2014/7, University of Göttingen, Germany, 2014.
- S8. L. J. Farrugia, *J. Appl. Cryst.* 1997, **30**, 565-565.



#### 4. MALDI-TOF-MS of intermediates A and B

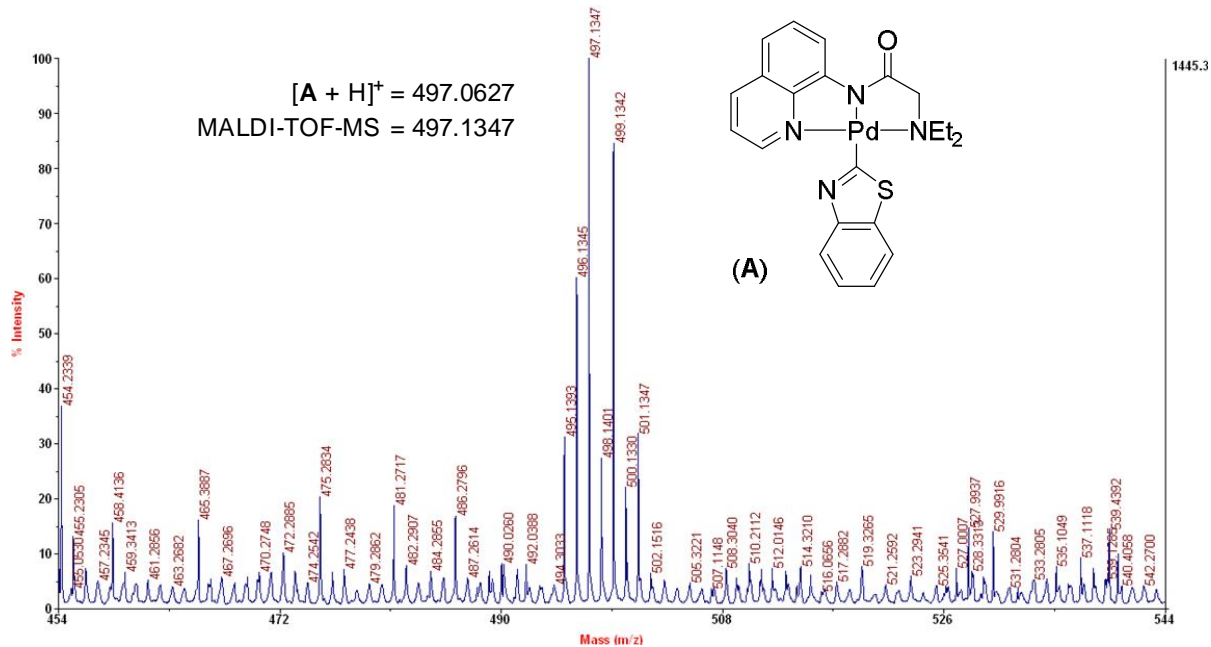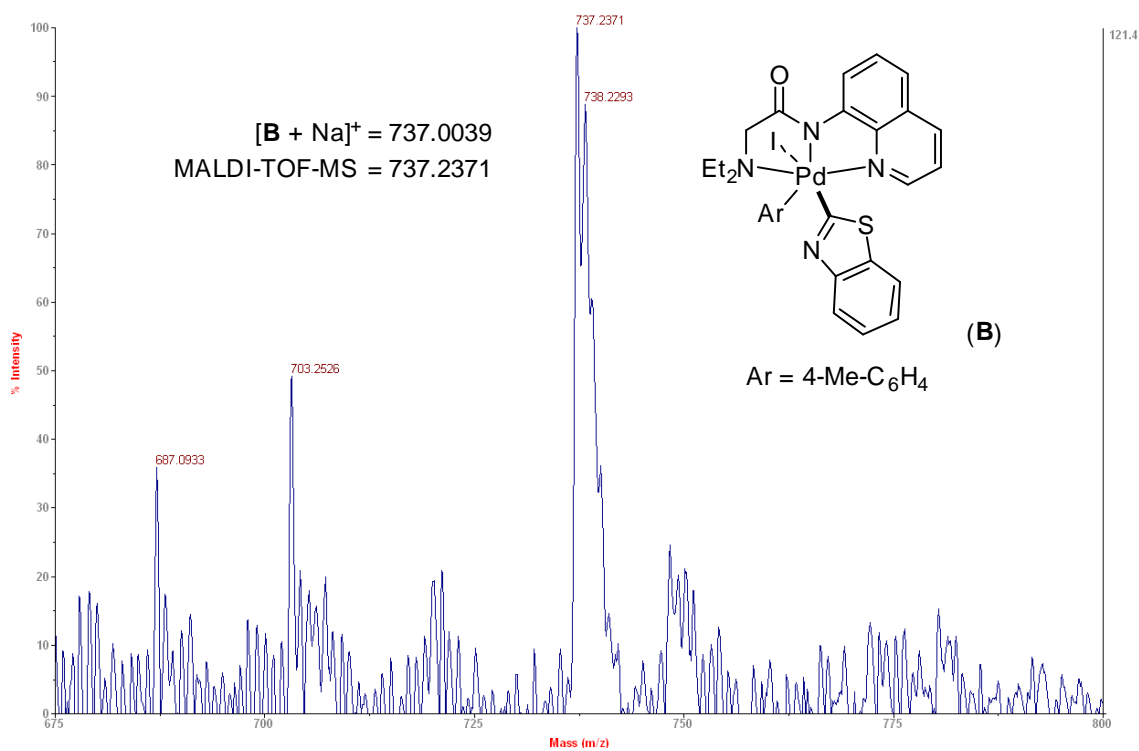

## 5. NMR spectra of ligand precursors

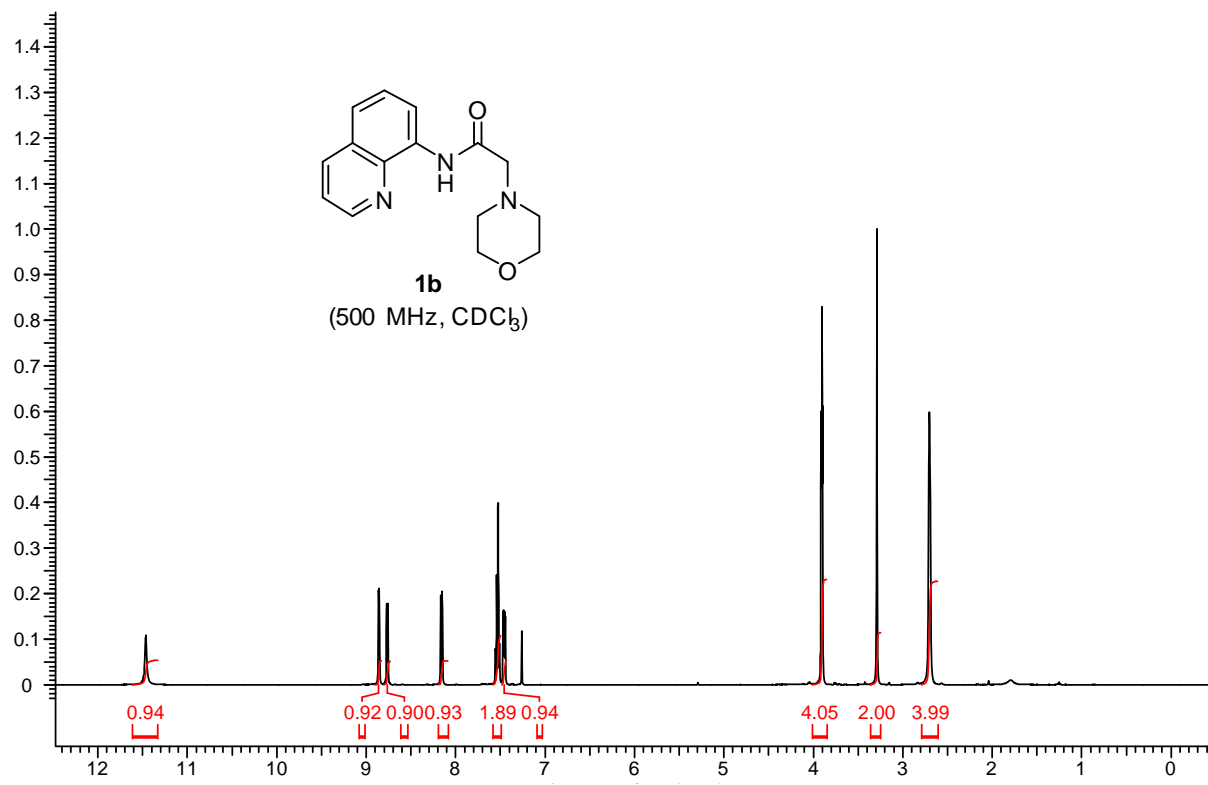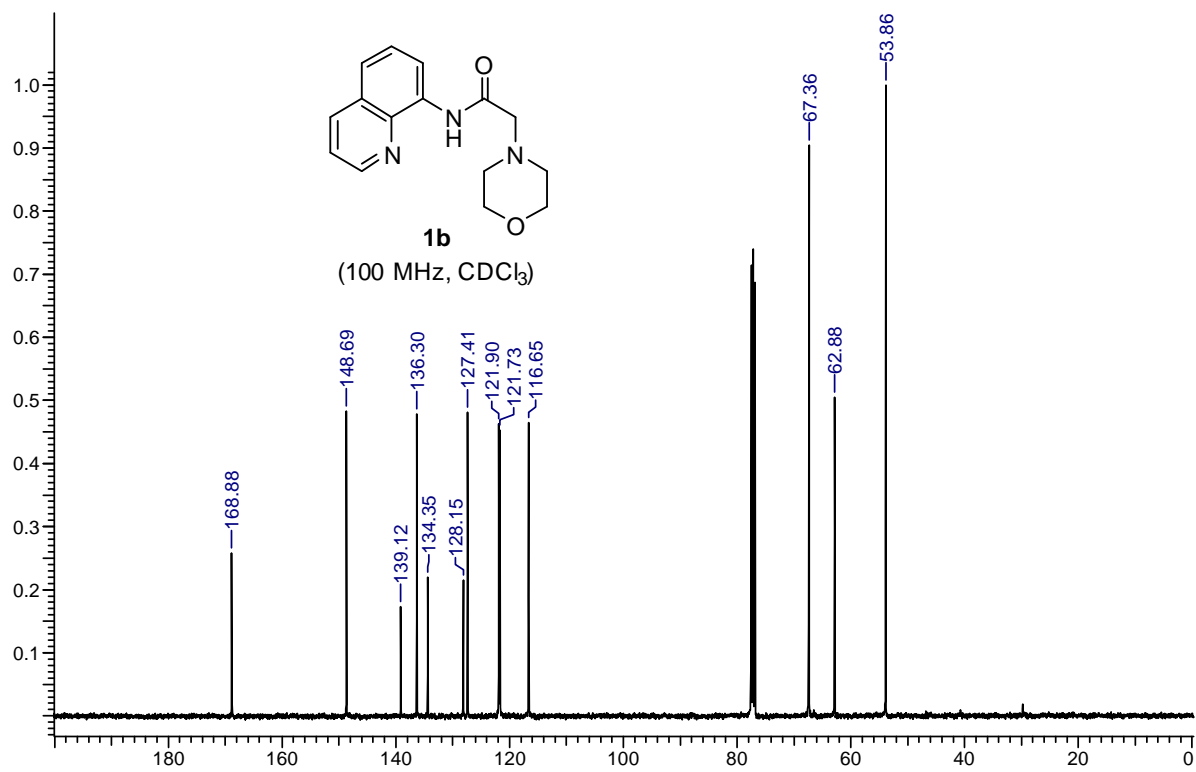

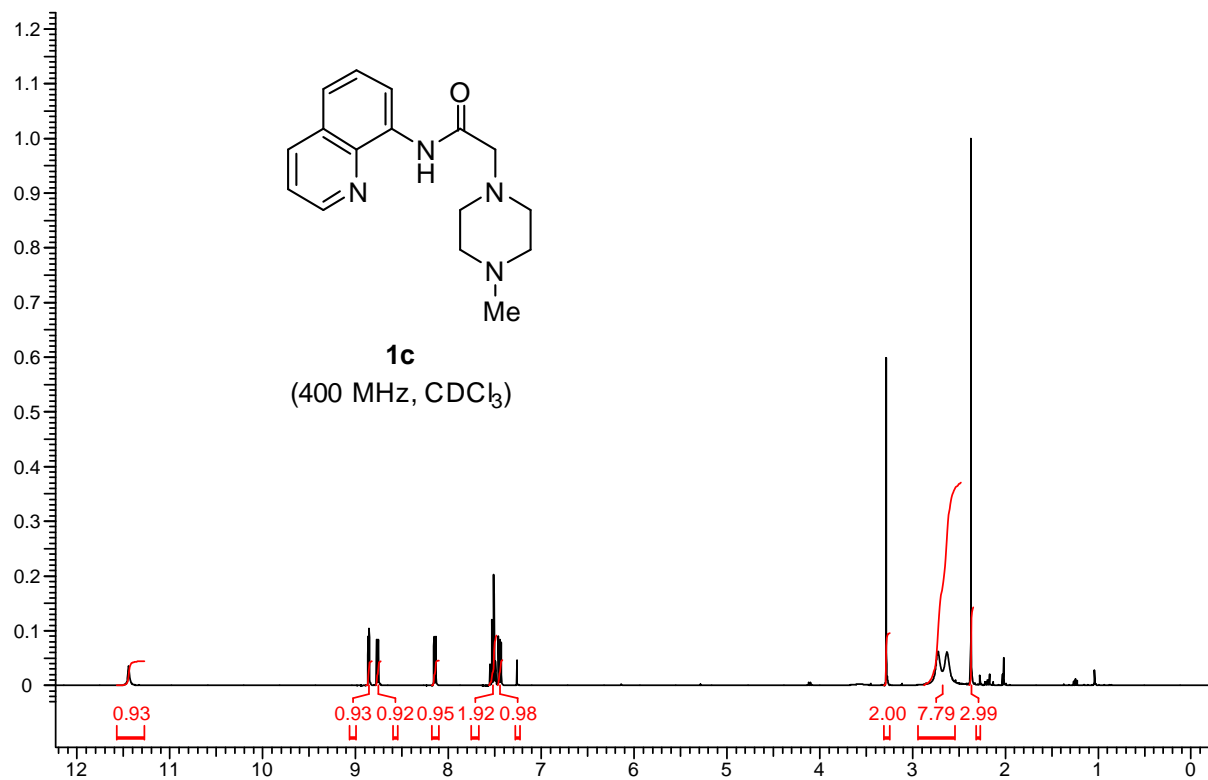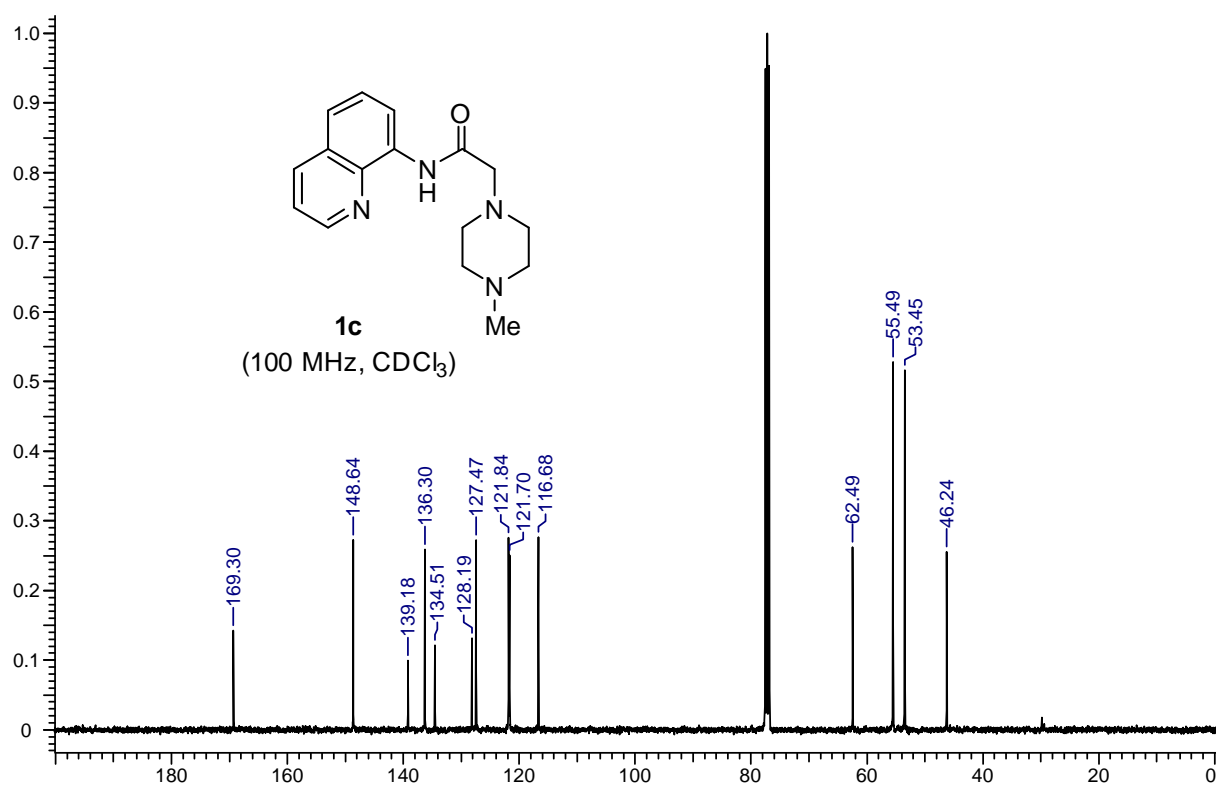

## 6. NMR spectra of palladium complexes

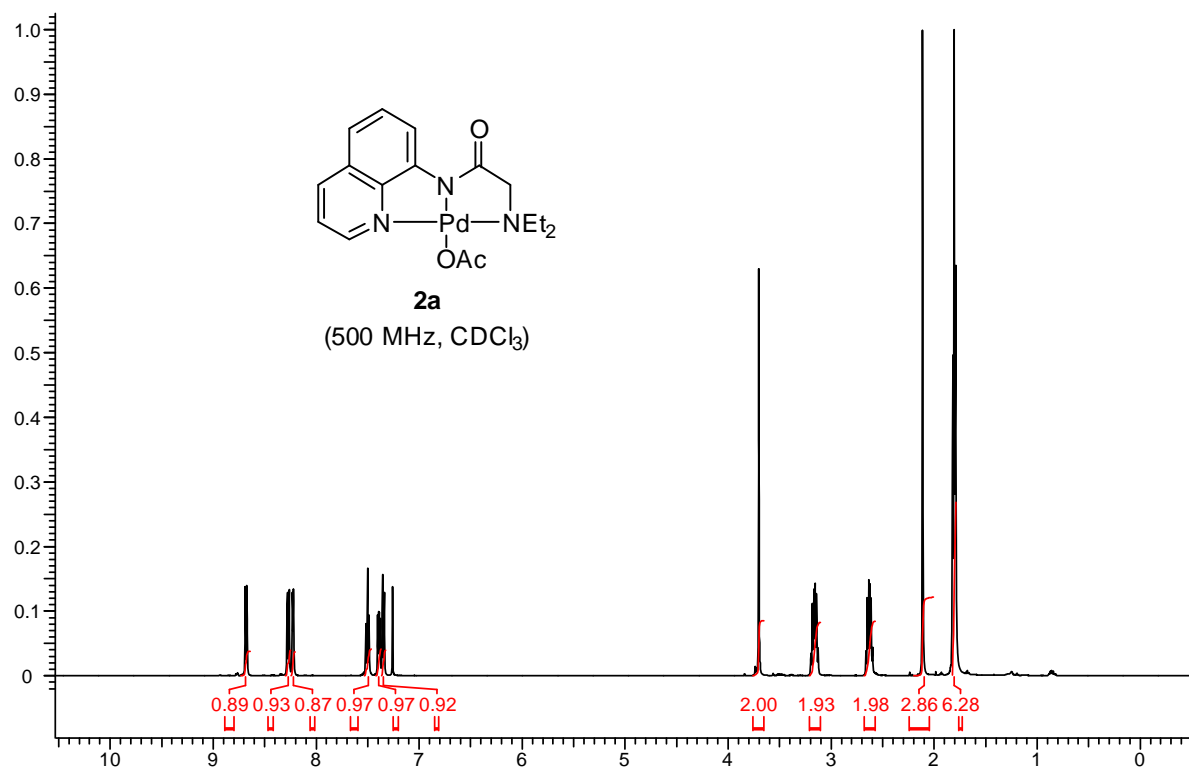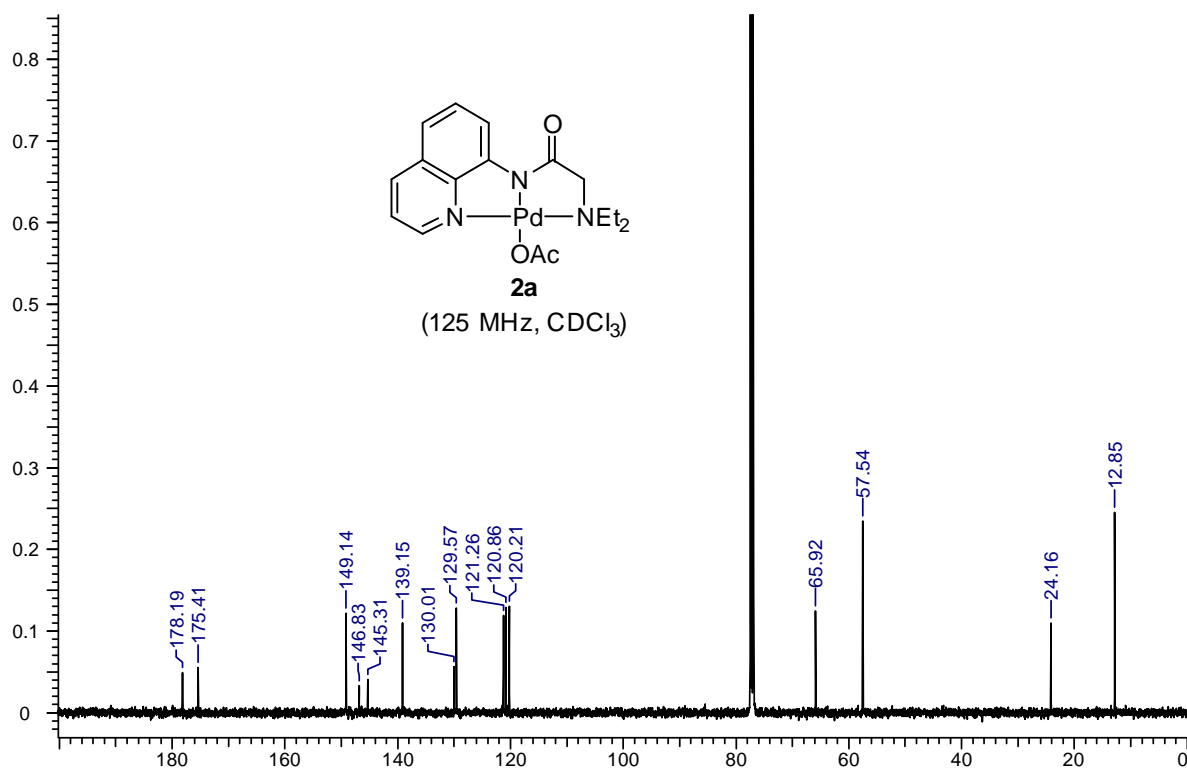

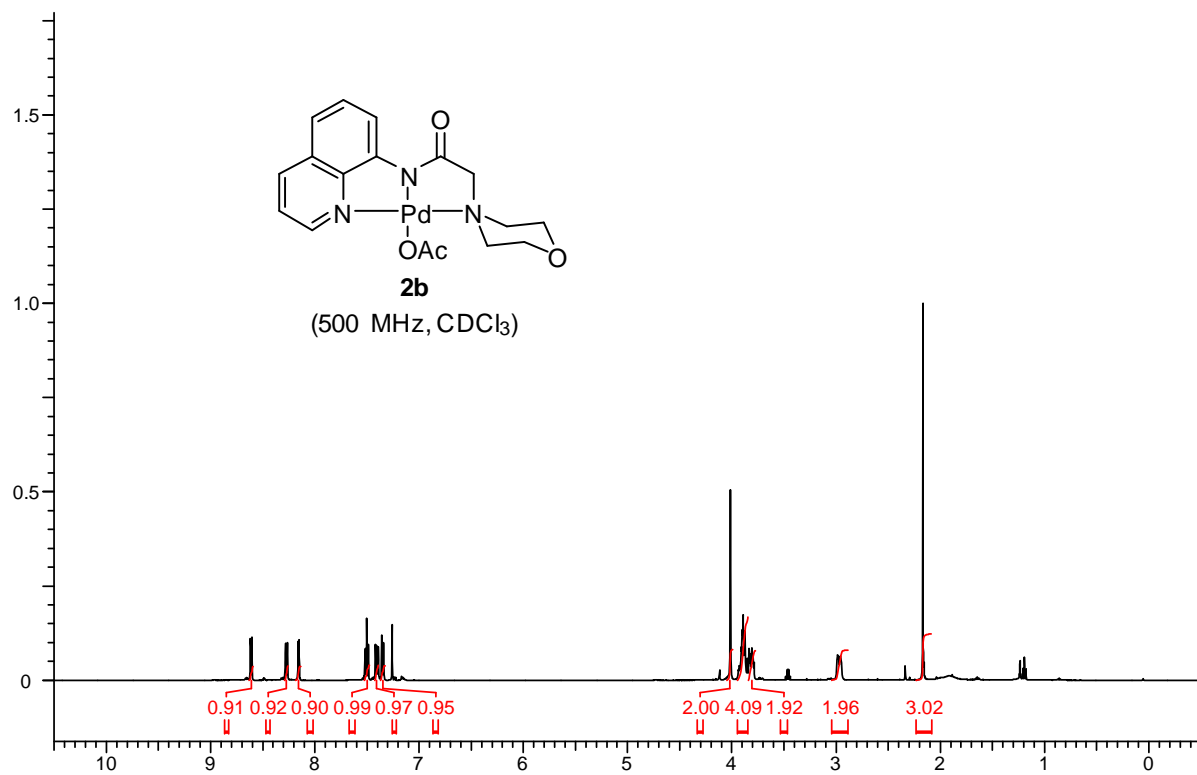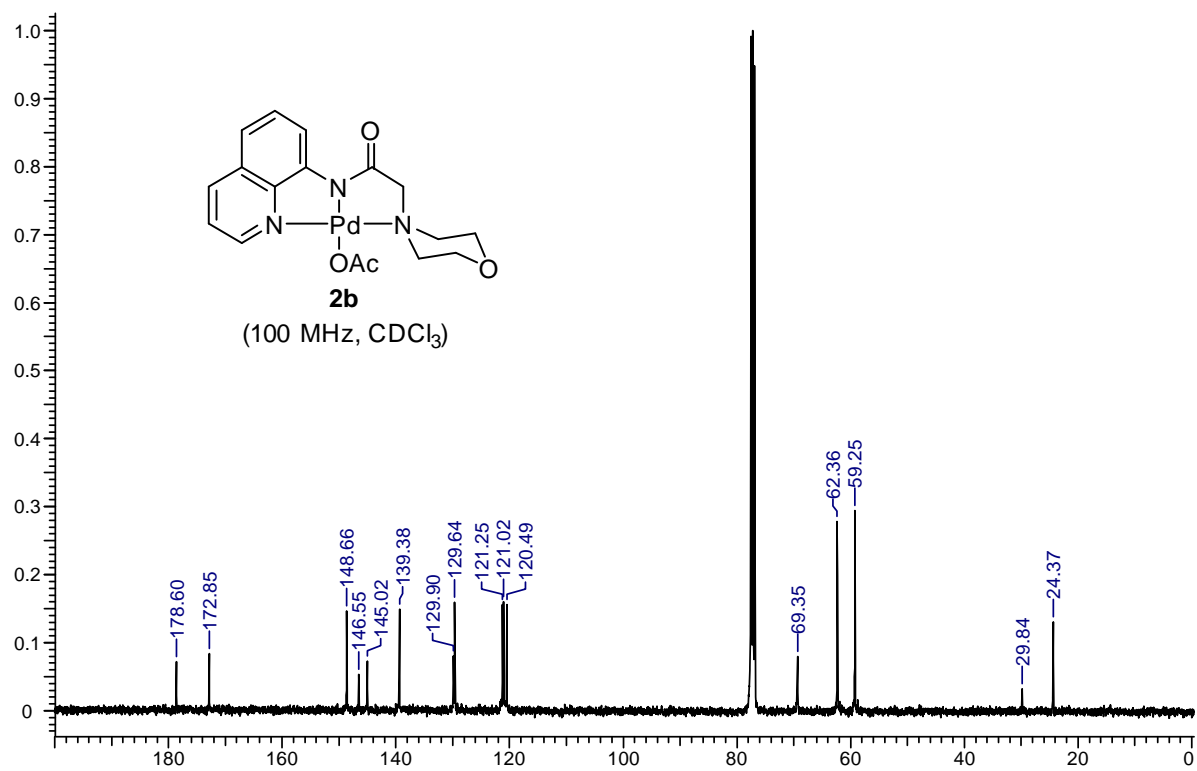

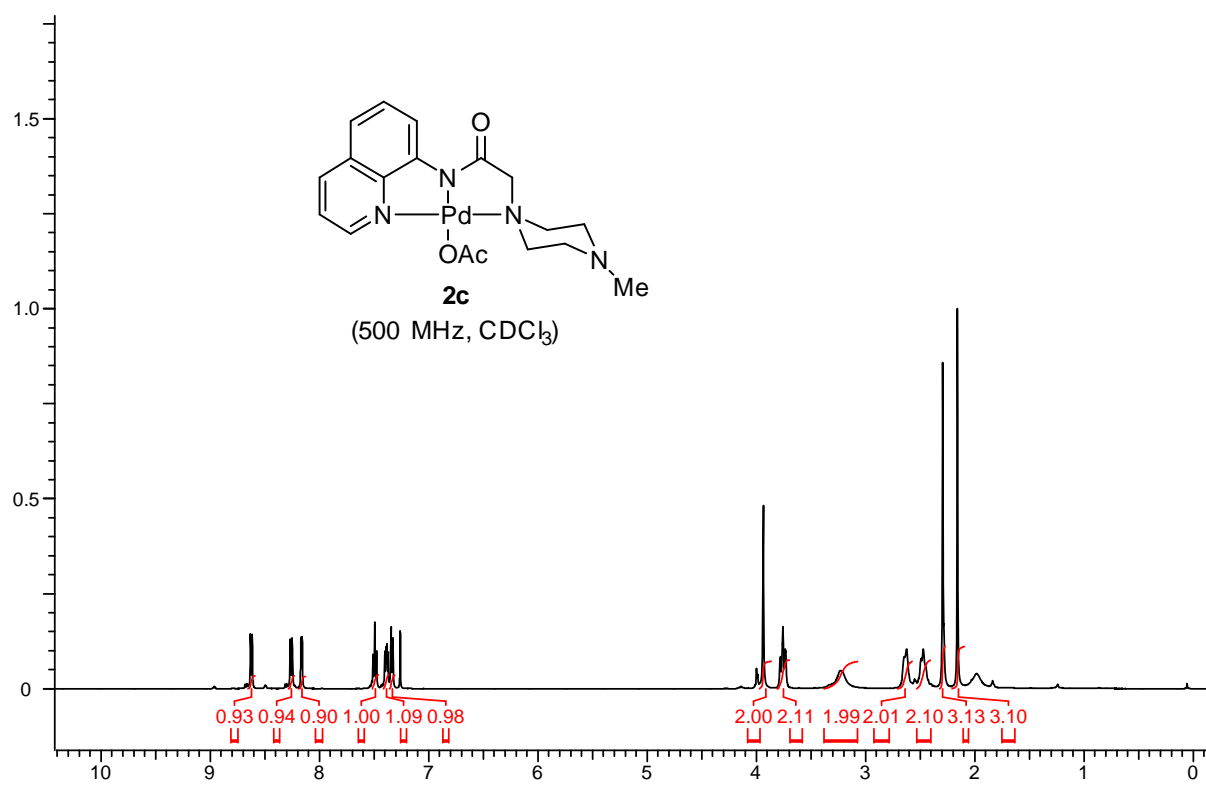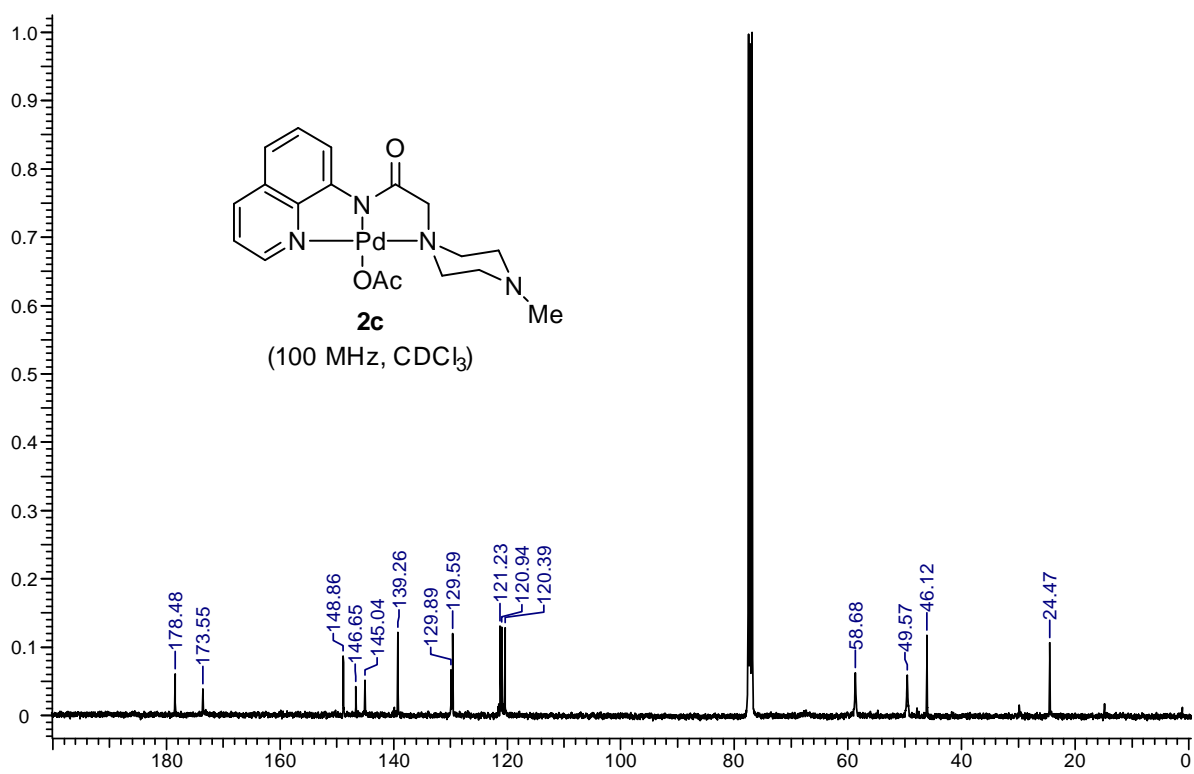

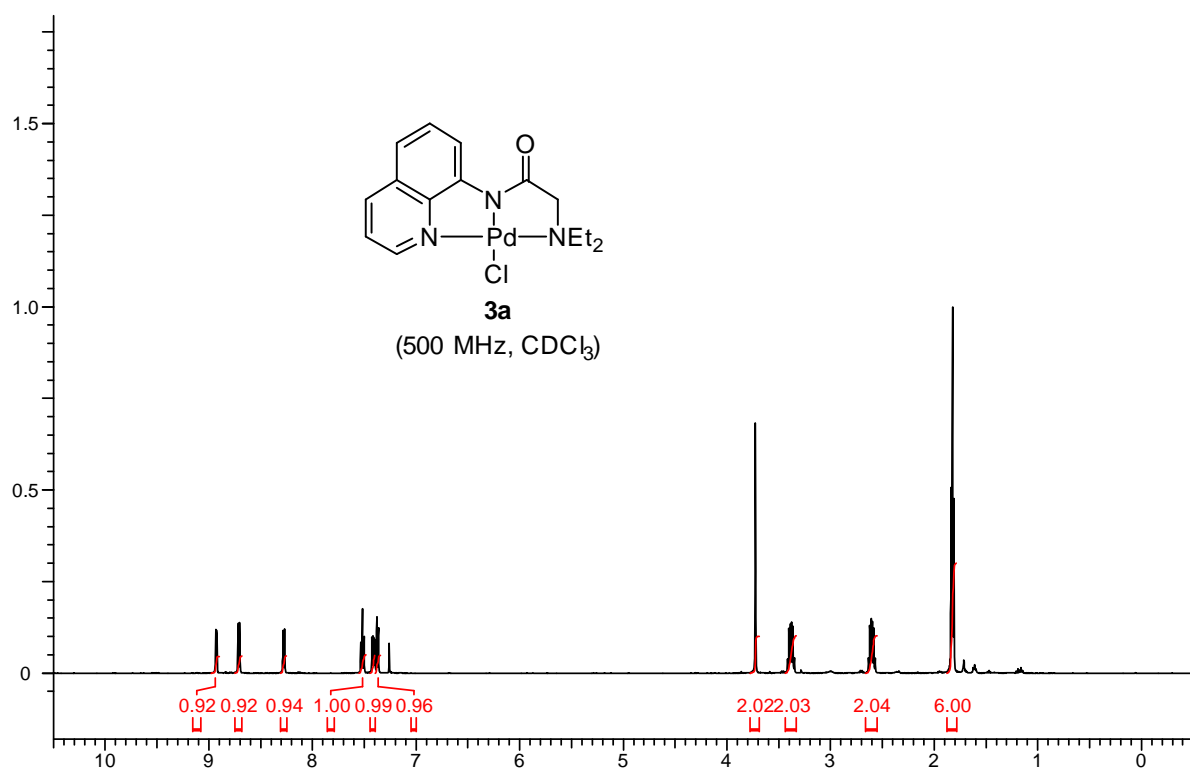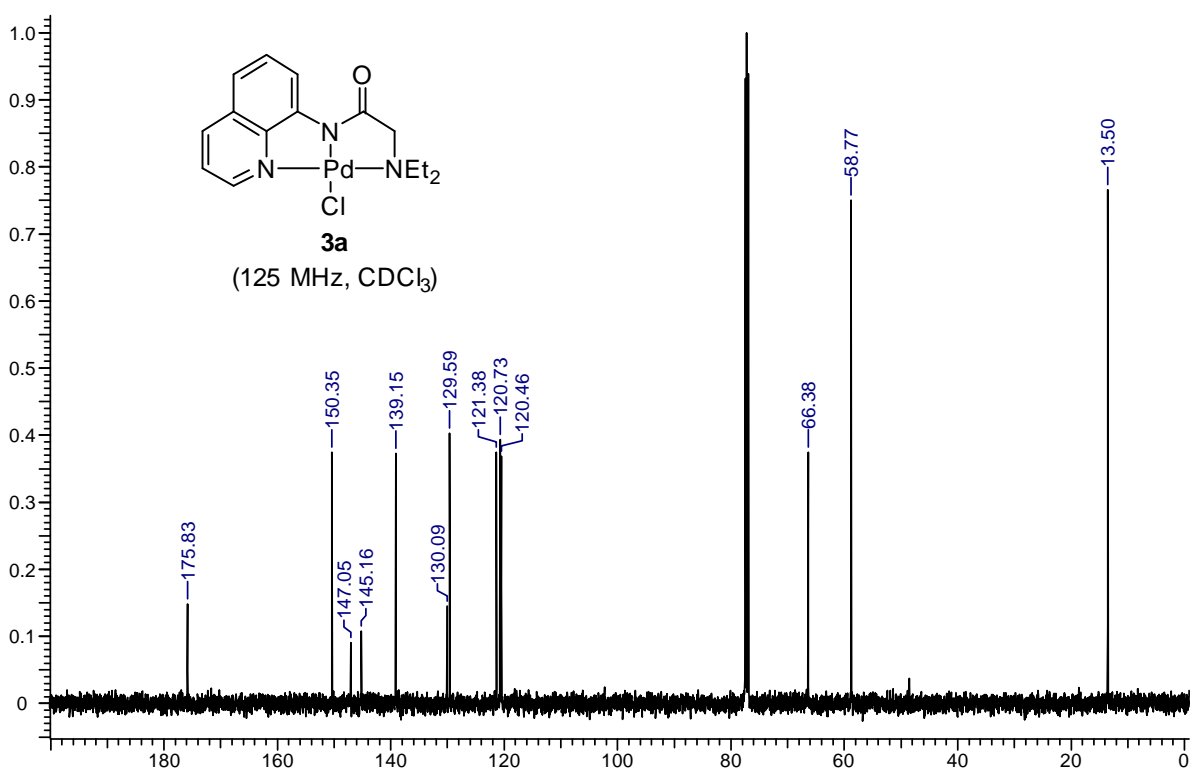

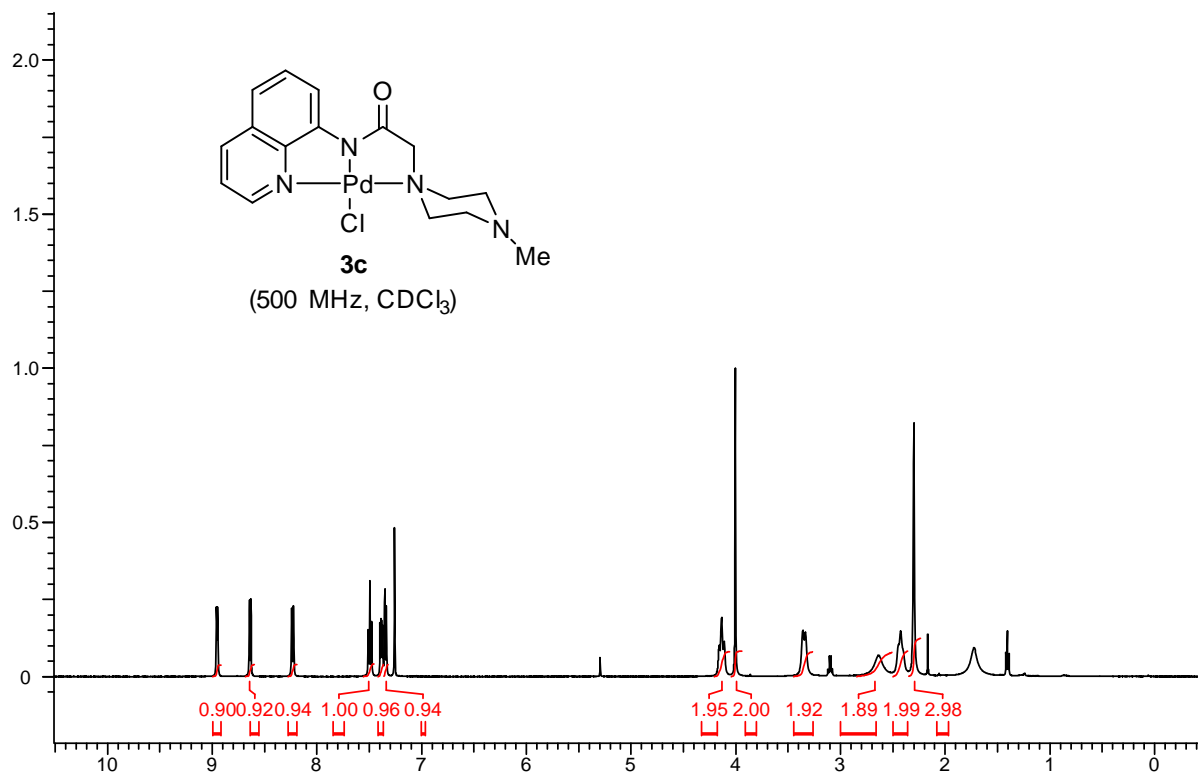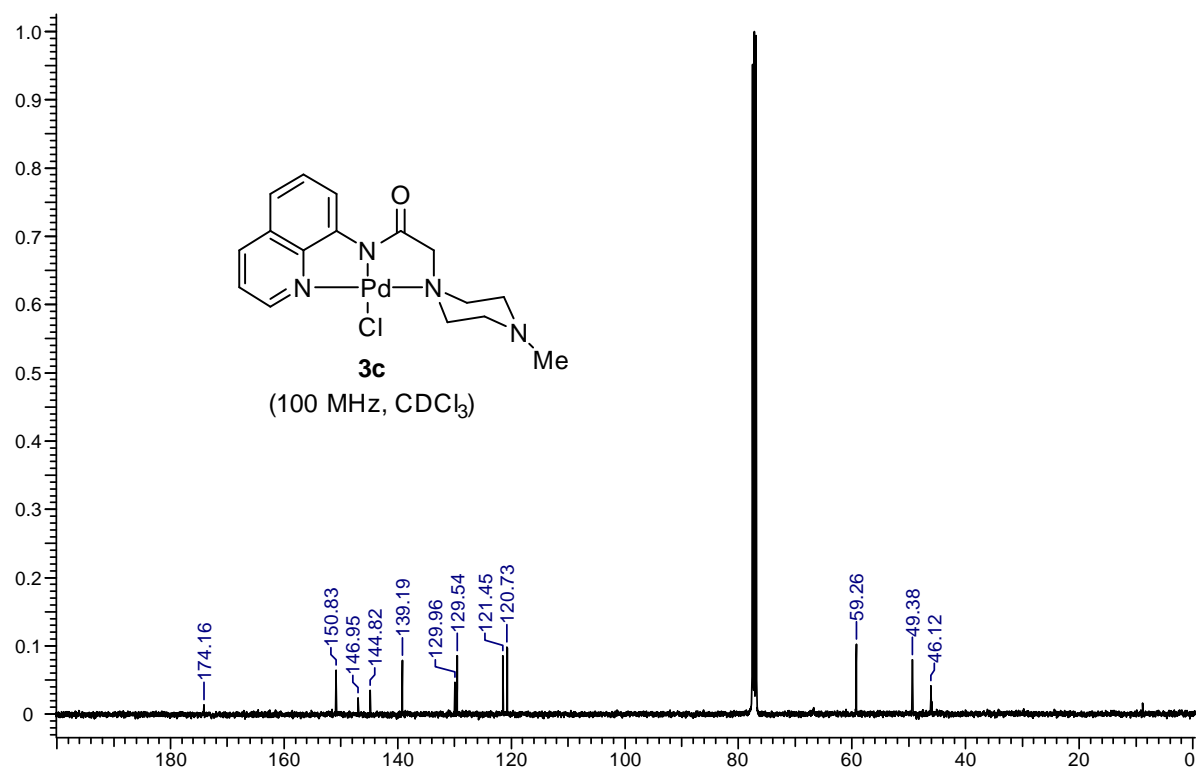



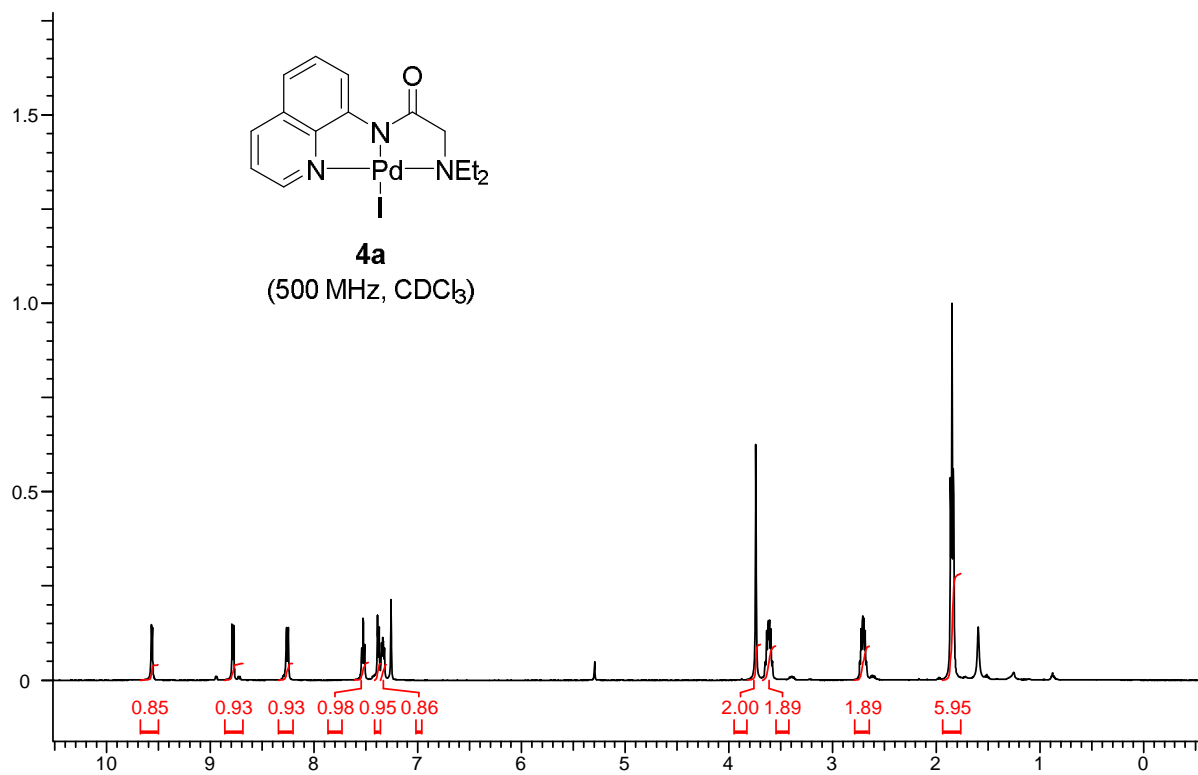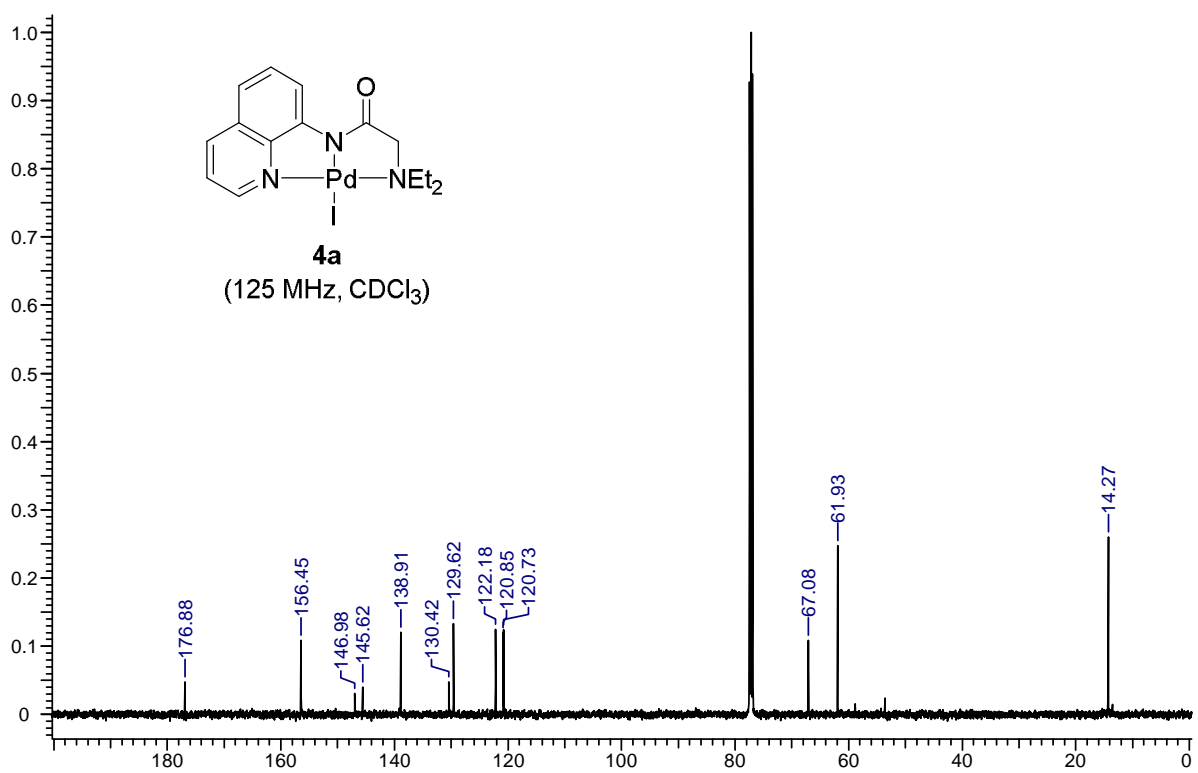

Supplement: c7nj00452d1.pdf [file c7nj00452d1.pdf]
